# Supplementary material for: Characterization of esophageal motor activity, gastroesophageal reflux, and evaluation of prokinetic effectiveness in mechanically ventilated critically ill patients: a high-resolution impedance manometry study
Source: Springer Nature journal article supplement (doi:10.1186/s13054-021-03479-8), 2021-02-08
Supplement: MOESM2 [file 18842322]

## Additional file 2

**Title:** High resolution manometry data in critically ill patients

| Patient number | Study group | DCI (mmHg.s.cm) | Failed peristalsis (%) | Panesophageal pressurisation (%) | Premature contraction (%) | IRP (mmHg) | IBP (mmHg) | Tone LES (mmHg) | EGJ-CI (mmHg.cm) | Insp. EGJ pressure (mmHg) | Exp. EGJ pressure (mmHg) |
|----------------|-------------|-----------------|------------------------|----------------------------------|---------------------------|------------|------------|-----------------|------------------|---------------------------|--------------------------|
| 1              | LGV         | 9 837           | 37                     | 37                               | 78                        | 17,6       | 21,7       | 16,6            | 64,5             | 27,5                      | 32,5                     |
| 2              | LGV         | 15 322          | 59                     | 59                               | 28                        | 21,8       | 14,3       | 29,4            | 38               | 48,5                      | 39                       |
| 3              | LGV         | 24 914          | 70                     | 70                               | 30                        | 51,15      | 40,85      | 59,65           | 168,5            | 110,5                     | 61,5                     |
| 4              | LGV         | 1 838           | 54                     | 54                               | 46                        | 13,4       | 26,2       | 14,4            | 24               | 39,5                      | 22,5                     |
| 5              | LGV         | 10 770          | 88                     | 88                               | 11                        | 37,1       | 16,6       | 36,1            | 52,5             | 48                        | 34                       |
| 6              | LGV         | 5 485           | 82                     | 82                               | 18                        | 10,15      | 27,75      | 25,6            | 53               | 39,5                      | 28                       |
| 7              | LGV         | 804             | 66                     | 66                               | 34                        | 25,4       | 16,6       | 24,2            | 59               | 24                        | 13,5                     |
| 8              | LGV         | 502             | 27                     | 25                               | 32                        | 18,7       | 15,35      | 19,75           | 40,5             | 37                        | 22                       |
| 9              | HGV         | 4 594           | 75                     | 75                               | 0                         | 6,05       | 20,45      | 7,9             | 22,5             | 40                        | 18,5                     |
| 10             | HGV         | 1 757           | 79                     | 79                               | 22                        | 20,1       | 16,4       | 21,1            | 39,5             | 29                        | 19                       |
| 11             | HGV         | 7 028           | 100                    | 100                              | 0                         | 19,15      | 29,8       | 14,4            | 82,5             | 34,5                      | 28                       |
| 12             | HGV         | 3 111           | 52                     | 52                               | 34                        | 5,9        | 31,6       | 6,4             | 29,5             | 26                        | 19,5                     |
| 13             | HGV         | 1 526           | 97                     | 97                               | 3                         | 3,4        | 24,75      | 8,75            | 13,5             | 33,5                      | 24,5                     |
| 14             | HGV         | 3 111           | 91                     | 63                               | 0                         | 6,05       | 24,75      | 8,75            | 29,5             | 33,5                      | 20,5                     |
| 15             | HGV         | 6 493           | 18                     | 18                               | 18                        | 14,7       | 40,9       | 26              | 90               | 48,5                      | 36,5                     |
| 16             | HGV         | 4               | 100                    | 0                                | 0                         | 5,7        | 4,6        | 7,9             | 0,75             | 8                         | 3,5                      |

DCI - distal contractile integral; IRP - integrated relaxation pressure; IBP - intrabolus pressure; LES - lower esophageal sphincter; EGJ-CI - esophagogastric junction contractile integral; EGJ - esophagogastric junction; LGV - low residual gastric volumes; HGV - high residual gastric volumes
