# Supplementary material for: Characterization of esophageal motor activity, gastroesophageal reflux, and evaluation of prokinetic effectiveness in mechanically ventilated critically ill patients: a high-resolution impedance manometry study
Source: Springer Nature journal article supplement (doi:10.1186/s13054-021-03479-8), 2021-02-08
Supplement: MOESM3 [file 18842322]

### Additional file 3

**Title:** Number of reflux episodes for the entire of recording period

| <b>Patient number</b> | <b>Study group</b> | <b>Number of refluxes/study period</b> |
|-----------------------|--------------------|----------------------------------------|
| 1                     | LGV                | 13                                     |
| 2                     | LGV                | 33                                     |
| 3                     | LGV                | 2                                      |
| 4                     | LGV                | 4                                      |
| 5                     | LGV                | 22                                     |
| 6                     | LGV                | 16                                     |
| 7                     | LGV                | 17                                     |
| 8                     | LGV                | 14                                     |
| 9                     | HGV                | 34                                     |
| 10                    | HGV                | 5                                      |
| 11                    | HGV                | 3                                      |
| 12                    | HGV                | 19                                     |
| 13                    | HGV                | 0                                      |
| 14                    | HGV                | 8                                      |
| 15                    | HGV                | 5                                      |
| 16                    | HGV                | 0                                      |
| <b>Total</b>          | <b>---</b>         | <b>195</b>                             |

LGV - low gastric volumes; HGV - high gastric volumes;
